# Supplementary material for: Investigating the Protective Effects of a Citrus Flavonoid on the Retardation Morphogenesis of the Oligodendroglia-like Cell Line by Rnd2 Knockdown
Source: Neurol Int. 2023 Dec 26;16(1):33–61. doi: 10.3390/neurolint16010003 (PMC10801557; doi:10.3390/neurolint16010003)
Supplement: Supplementary file 1 [file neurolint-16-00003-s001.zip › Tables S1 to S18.xlsx]

## Sheet: Table S1
Table S1
		Control knockdown	Rnd2 knockdown
	Experiment 1	56.0606	26.3158
	Experiment 2	74.6835	27.027
	Experiment 3	59.2105	36.3636
	Experiment 4	65.2174	28.5714
	Experiment 5	57.1429	40
	Experiment 6	56.1404	27.7778
	Experiment 7	67.8571	30.7692
	Experiment 8	53.0303	27.2727
	Experiment 9	62.5	36
	Experiment 10	61.4286	34.8485
	Average	61.3271	31.4946
	Standard deviation	6.18886	4.63774
	t(df)	11.57(17)
	p	1.74943e-09

## Sheet: Table S2
Table S2
CNPase		Raw CNPase values for control knockdown	Raw CNPase values for Rnd2 knockdown			Control knockdown: normalized-to-actin values (CNPase per actin)	Rnd2 knockdown: normalized-to-actin values (CNPase per actin)
	Experiment 1	77.451	57.455		Experiment 1	0.651467	0.503704
	Experiment 2	85.431	61.446		Experiment 2	0.789989	0.637711
	Experiment 3	61.442	42.141		Experiment 3	0.643069	0.397966
					Average	0.694842	0.513127
					Standard deviation	0.082507	0.12015
					t(df)	5.73(2)
					p	0.0291468
PLP1		Raw PLP1 values for control knockdown	Raw PLP1 values for Rnd2 knockdown			Control knockdown: normalized-to-actin values (PLP1 per actin)	Rnd2 knockdown: normalized-to-actin values (PLP1 per actin)
	Experiment 1	66.049	44.409		Experiment 1	0.555561	0.389331
	Experiment 2	79.911	49.49		Experiment 2	0.738945	0.513627
	Experiment 3	73.642	43.56		Experiment 3	0.770757	0.411366
					Average	0.688421	0.438108
					Standard deviation	0.116154	0.0663228
					t(df)	4.38(2)
					p	0.0483664
Sox10		Raw Sox10 values for control knockdown	Raw Sox10 values for Rnd2 knockdown			Control knockdown: normalized-to-actin values (Sox10 per actin)	Rnd2 knockdown: normalized-to-actin values (Sox10 per actin)
	Experiment 1	88.418	81.922		Experiment 1	0.743715	0.718205
	Experiment 2	89.132	76.36		Experiment 2	0.824213	0.792494
	Experiment 3	81.425	77.531		Experiment 3	0.852216	0.732177
					Average	0.806714	0.747625
					Standard deviation	0.0563275	0.0394807
					t(df)	1.94(2)
					p	0.192557
Actin		Raw Actin values for control knockdown	Raw Actin values for Rnd2 knockdown
	Experiment 1	118.887	114.065
	Experiment 2	108.142	96.354
	Experiment 3	95.545	105.891

## Sheet: Table S3
Table S3
		Control siRNA	Rnd2 siRNA
	Experiment 1	49.1803	20.4545
	Experiment 2	50	27.907
	Experiment 3	60.9756	21.5686
	Experiment 4	54.5455	21.1538
	Experiment 5	60.6061	25.7143
	Experiment 6	59.4595	26.7857
	Experiment 7	54.4118	17.3913
	Experiment 8	68.75	21.2121
	Experiment 9	61.5385	23.2558
	Experiment 10	68.75	27.027
	Average	58.8217	23.247
	Standard deviation	6.4905	3.28694
	t(df)	14.67(13)
	p	1.817e-09

## Sheet: Table S4
Table S4
CNPase		Raw CNPase values for control siRNA	Raw CNPase values for Rnd2 siRNA			Control siRNA: normalized-to-actin values (CNPase per actin)	Rnd2 siRNA: normalized-to-actin values (CNPase per actin)
	Experiment 1	51.877	15.36		Experiment 1	0.978811	0.313469
	Experiment 2	44.384	14.113		Experiment 2	0.853538	0.276725
	Experiment 3	40.094	19.559		Experiment 3	0.80188	0.425196
					Average	0.878077	0.338464
					Standard deviation	0.0909822	0.0773264
					t(df)	6.32(2)
					p	0.0241318
PLP1		Raw PLP1 values for control siRNA	Raw PLP1 values for Rnd2 siRNA			Control siRNA: normalized-to-actin values (PLP1 per actin)	Rnd2 siRNA: normalized-to-actin values (PLP1 per actin)
	Experiment 1	69.074	14.415		Experiment 1	1.30328	0.294184
	Experiment 2	83.691	40.653		Experiment 2	1.60944	0.797118
	Experiment 3	70.461	37.032		Experiment 3	1.40922	0.805043
					Average	1.44065	0.632115
					Standard deviation	0.155481	0.292684
					t(df)	6.92(2)
					p	0.0202729
Sox10		Raw Sox10 values for control siRNA	Raw Sox10 values for Rnd2 siRNA			Control siRNA: normalized-to-actin values (Sox10 per actin)	Rnd2 siRNA: normalized-to-actin values (Sox10 per actin)
	Experiment 1	69.411	55.94		Experiment 1	1.30964	1.14163
	Experiment 2	56.89	61.345		Experiment 2	1.09404	1.20284
	Experiment 3	72.657	70.647		Experiment 3	1.45314	1.5358
					Average	1.28561	1.29343
					Standard deviation	0.180753	0.212125
					t(df)	-0.089(2)
					p	0.937455
Actin		Raw Actin values for control siRNA	Raw Actin values for Rnd2 siRNA
	Experiment 1	53.132	49.017
	Experiment 2	52.217	51.113
	Experiment 3	50.478	46.307

## Sheet: Table S5
Table S5
		Control siRNA	Prag1 siRNA
	Experiment 1	64.5455	23.1707
	Experiment 2	69.3878	34.1463
	Experiment 3	74.3243	24.3902
	Experiment 4	71.6667	27.027
	Experiment 5	62.5	26.9231
	Experiment 6	60	27.7778
	Experiment 7	58.6207	31.4815
	Experiment 8	63.4615	30.8824
	Experiment 9	58.7302	31.8182
	Experiment 10	53.4884	33.9623
	Average	63.6725	29.1579
	Standard deviation	6.15926	3.65285
	t(df)	14.46(15)
	p	3.25562e-10

## Sheet: Table S6
Table S6
CNPase		Raw CNPase values for control siRNA	Raw CNPase values for Prag1 siRNA			Control siRNA: normalized-to-actin values (CNPase per actin)	Prag1 siRNA: normalized-to-actin values (CNPase per actin)
	Experiment 1	50.859	14.228		Experiment 1	0.961891	0.31033
	Experiment 2	37.591	17.46		Experiment 2	0.710632	0.304584
	Experiment 3	39.095	9.667		Experiment 3	0.768513	0.200386
					Average	0.813678	0.271767
					Standard deviation	0.131578	0.0618845
					t(df)	7.52(2)
					p	0.0172337
PLP1		Raw PLP1 values for control siRNA	Raw PLP1 values for Prag1 siRNA			Control siRNA: normalized-to-actin values (PLP1 per actin)	Prag1 siRNA: normalized-to-actin values (PLP1 per actin)
	Experiment 1	81.989	34.346		Experiment 1	1.55065	0.749128
	Experiment 2	66.429	14.101		Experiment 2	1.25579	0.245988
	Experiment 3	53.31	29.217		Experiment 3	1.04794	0.605634
					Average	1.2848	0.533583
					Standard deviation	0.252604	0.259193
					t(df)	4.53(2)
					p	0.04539
Sox10		Raw Sox10 values for control siRNA	Raw Sox10 values for Prag1 siRNA			Control siRNA: normalized-to-actin values (Sox10 per actin)	Prag1 siRNA: normalized-to-actin values (Sox10 per actin)
	Experiment 1	71.644	68.524		Experiment 1	1.35499	1.49459
	Experiment 2	63.872	56.782		Experiment 2	1.20746	0.990545
	Experiment 3	52.517	54.359		Experiment 3	1.03236	1.1268
					Average	1.19827	1.20398
					Standard deviation	0.161515	0.260736
					t(df)	-0.051(2)
					p	0.964003
Actin		Raw Actin values for control siRNA	Raw Actin values for Prag1 siRNA
	Experiment 1	52.874	45.848
	Experiment 2	52.898	57.324
	Experiment 3	50.871	48.242

## Sheet: Table S7
Table S7
		Control siRNA	Fyn siRNA
	Experiment 1	49.4382	18.5185
	Experiment 2	46.7532	19.3548
	Experiment 3	43.038	22.0339
	Experiment 4	51.9231	13.4615
	Experiment 5	49.0909	8.51064
	Experiment 6	56.5217	13.1148
	Experiment 7	57.8947	20.9677
	Experiment 8	50	10.1695
	Experiment 9	45.7143	12.1212
	Experiment 10	44.4444	17.8571
	Average	49.4819	15.611
	Standard deviation	4.63959	4.47793
	t(df)	15.76(18)
	p	5.63029e-12

## Sheet: Table S8
Table S8
CNPase		Raw CNPase values for control siRNA	Raw CNPase values for Fyn siRNA			Control siRNA: normalized-to-actin values (CNPase per actin)	Fyn siRNA: normalized-to-actin values (CNPase per actin)
	Experiment 1	37.195	21.461		Experiment 1	0.437861	0.30292
	Experiment 2	22.368	15.254		Experiment 2	0.317205	0.218348
	Experiment 3	23.79	10.246		Experiment 3	0.298742	0.134924
					Average	0.351269	0.218731
					Standard deviation	0.075557	0.0839988
					t(df)	7.05(2)
					p	0.0195145
PLP1		Raw PLP1 values for control siRNA	Raw PLP1 values for Fyn siRNA			Control siRNA: normalized-to-actin values (PLP1 per actin)	Fyn siRNA: normalized-to-actin values (PLP1 per actin)
	Experiment 1	51.703	29.837		Experiment 1	0.60865	0.421147
	Experiment 2	48.28	27.492		Experiment 2	0.684667	0.393524
	Experiment 3	39.86	16.398		Experiment 3	0.50054	0.215936
					Average	0.597952	0.343536
					Standard deviation	0.0925286	0.111364
					t(df)	7.59(2)
					p	0.0169095
Sox10		Raw Sox10 values for control siRNA	Raw Sox10 values for Fyn siRNA			Control siRNA: normalized-to-actin values (Sox10 per actin)	Fyn siRNA: normalized-to-actin values (Sox10 per actin)
	Experiment 1	68.049	69.428		Experiment 1	0.801076	0.979971
	Experiment 2	72.773	71.081		Experiment 2	1.03201	1.01746
	Experiment 3	76.058	74.569		Experiment 3	0.955095	0.981959
					Average	0.929392	0.993131
					Standard deviation	0.117591	0.0210957
					t(df)	-1.08(2)
					p	0.391692
Actin		Raw Actin values for control siRNA	Raw Actin values for Fyn siRNA
	Experiment 1	84.947	70.847
	Experiment 2	70.516	69.861
	Experiment 3	79.634	75.939

## Sheet: Table S9
Table S9
	Hes	-	+
		Control siRNA	Control siRNA
	Experiment 1	53.7037	70.3125
	Experiment 2	56.5217	66.6667
	Experiment 3	55.102	65.8537
	Experiment 4	54.1667	75
	Experiment 5	50	63.6364
	Experiment 6	54.902	75
	Experiment 7	65.7143	70.7317
	Experiment 8	63.1579	65.7143
	Experiment 9	51.3514	65.8537
	Experiment 10	56.4103	78.3784
	Average	56.103	69.7147
	Standard deviation	4.6281	4.73682
	t(df)	-6.17(18)
	p	8.03335e-06

## Sheet: Table S10
Table S10
CNPase	Hes	-	+		Hes	-	+
		Raw CNPase values for control siRNA	Raw CNPase values for control siRNA			Control siRNA: normalized-to-actin values (CNPase per actin)	Control siRNA: normalized-to-actin values (CNPase per actin)
	Experiment 1	56.354	62.977		Experiment 1	0.971068	1.05901
	Experiment 2	57.188	60.051		Experiment 2	0.855826	1.01926
	Experiment 3	55.64	60.897		Experiment 3	0.935032	1.04859
					Average	0.920642	1.04229
					Standard deviation	0.0589533	0.0206073
					t(df)	-5.49(2)
					p	0.0316383
PLP1	Hes	-	+		Hes	-	+
		Raw PLP1 values for control siRNA	Raw PLP1 values for control siRNA			Control siRNA: normalized-to-actin values (PLP1 per actin)	Control siRNA: normalized-to-actin values (PLP1 per actin)
	Experiment 1	49.07	75.841		Experiment 1	0.845553	1.27532
	Experiment 2	49.973	62.079		Experiment 2	0.747853	1.05369
	Experiment 3	33.209	48.096		Experiment 3	0.558078	0.82817
					Average	0.717161	1.05239
					Standard deviation	0.146174	0.22358
					t(df)	-6.93(2)
					p	0.0202006
Sox10	Hes	-	+		Hes	-	+
		Raw Sox10 values for control siRNA	Raw Sox10 values for control siRNA			Control siRNA: normalized-to-actin values (Sox10 per actin)	Control siRNA: normalized-to-actin values (Sox10 per actin)
	Experiment 1	28.516	39.103		Experiment 1	0.491376	0.657547
	Experiment 2	29.166	36.455		Experiment 2	0.436473	0.618762
	Experiment 3	26.123	30.733		Experiment 3	0.438998	0.529195
					Average	0.455615	0.601835
					Standard deviation	0.0309949	0.065829
					t(df)	-5.15(2)
					p	0.0357037
Actin	Hes	-	+
		Raw Actin values for control siRNA	Raw Actin values for control siRNA
	Experiment 1	58.033	59.468
	Experiment 2	66.822	58.916
	Experiment 3	59.506	58.075

[truncated: 8 more sheets: Table S11, Table S12, Table S13, Table S14, Table S15, Table S16, Table S17, Table S18]
